# Supplementary material
Source: PubMed Central journal article supplement (PMC11071966)
Supplement: 18_2020_3553_MOESM1_ESM.pdf [file 18_2020_3553_MOESM1_ESM.pdf]

# Supplementary Figures and Legends

Suppl. Fig. 1

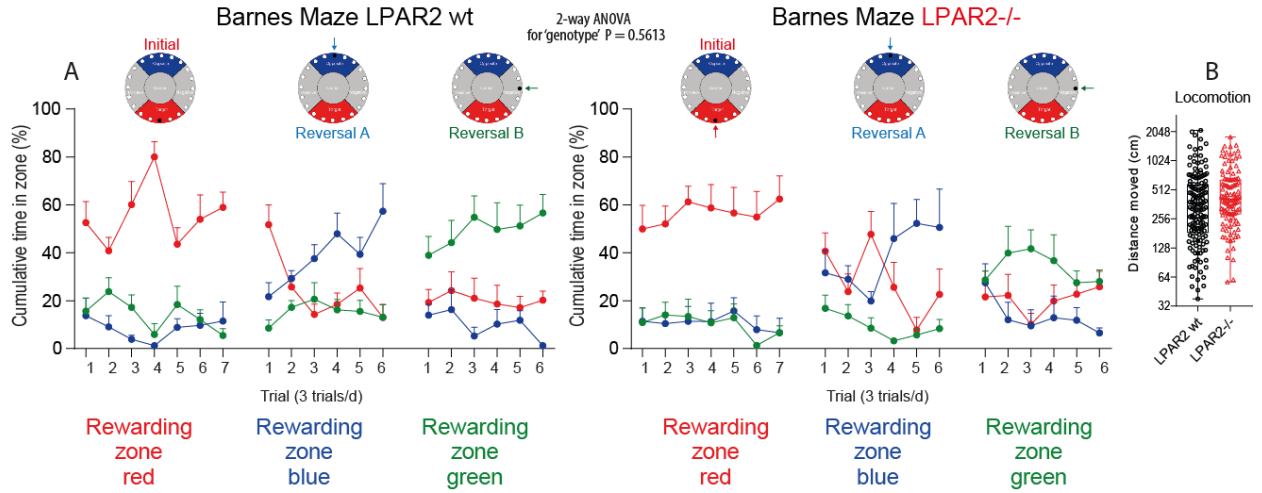

C Social cognition and memory

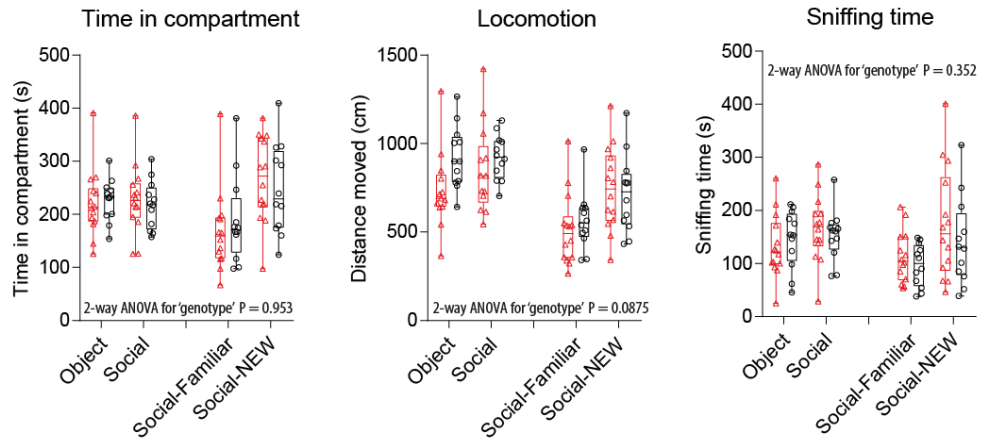

D Elevated Zero Maze

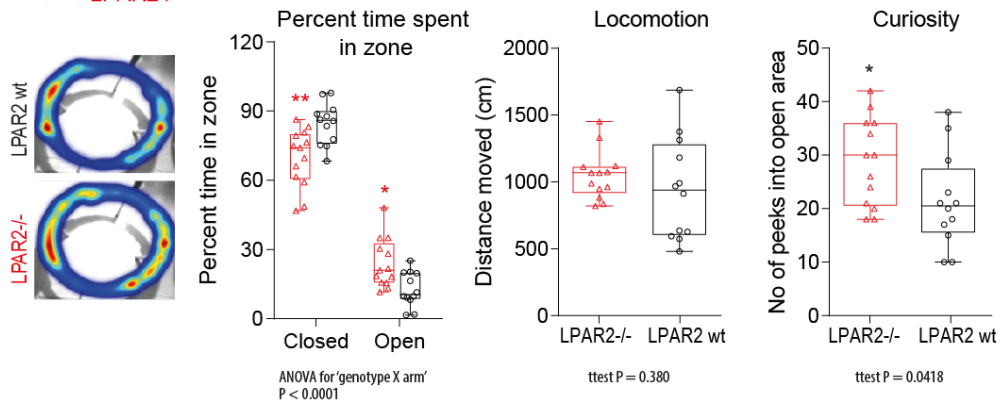

### *Supplementary Figure 1*

#### *Spatial and social cognition, and anxiety of wild type (LPAR2 wt) and LPAR2<sup>-/-</sup> mice in Barnes Maze, Social and Elevated Zero Maze tests*

**A:** Avoidance based spatial learning and reversal learning using a standard Barnes Maze. Data show the mean  $\pm$  sem of the cumulative time spent in the respective compartment as illustrated. The results are from n = 6-8 male mice per group, age at start 88-97 weeks.

**B:** Total distance travelled during Barnes Maze trials. All trials were pooled.

**C:** Social cognition and memory showing the time spent in respective compartments with object versus social partner, and familiar versus novel social partner, distances travelled per trial and sniffing times. Each test was 10 min.

**D:** Anxiety-like behavior in a standard Elevated Zero Maze showing the time spent in open and closed semicircles, total distance travelled during a test, which lasted for 10 min, and the number of peeks into open circles from the closed area showing the curiosity.

The data are from n = 10-14 female mice per group, age 30-40 weeks and were compared with 2-way ANOVA and subsequent t-test according to Šidák or 2-tailed unpaired t-tests in case of two groups. Asterisks indicate significant differences \*\*P < 0.01, \*P < 0.05.

## Suppl. Fig 2

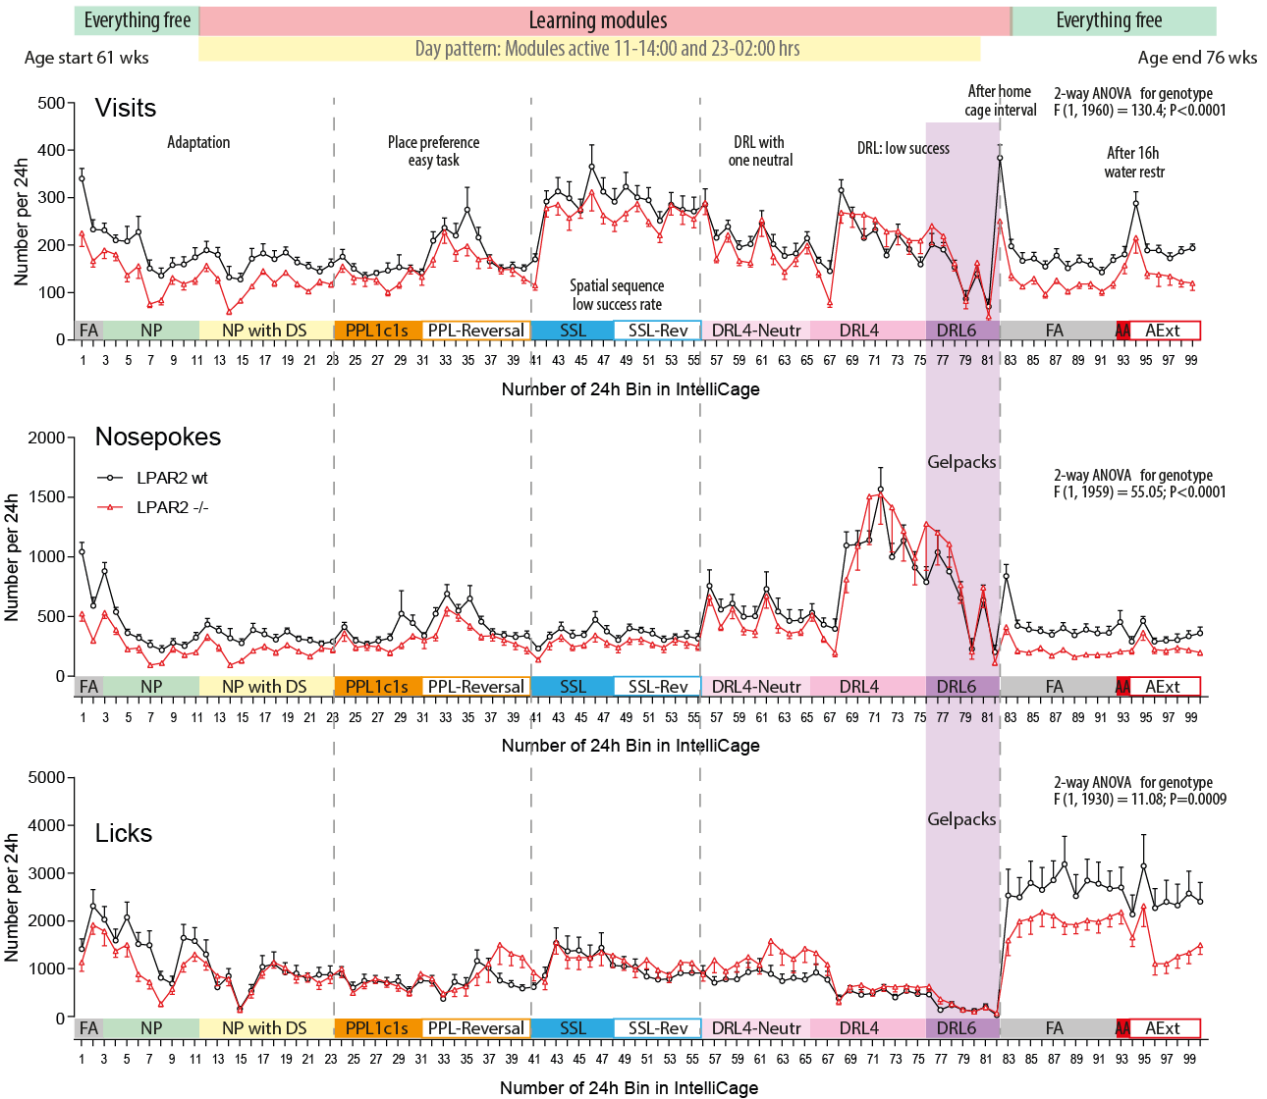

### Supplementary Figure 2

#### Basic activity parameters over time in IntelliCage tasks

Visits, nosepokes and licks and the ratio of nosepokes per visit in 24h bins showing the general activity in the IntelliCage in female LPAR2<sup>-/-</sup> and LPAR2 wt mice. Mice were 60-70 weeks old at the onset of the IntelliCage experiments. The data show the mean  $\pm$  sem of n = 12 mice per group, which were housed in subgroups of 6/6 of each genotype per IntelliCage throughout the experiments, with few home cage interruptions required by specific tasks or for cage cleaning reasons.

The time schedule of the different tasks is illustrated below the licks. The adaptation started with "free adaptation" (FA), during which all doors were open and water freely available. This was followed by "nosepoke adaptation" (NP), during which all doors were closed but could be opened with a NP at the door for 5 s. The NP settings were maintained during the following experiments.

During "drinking session" (DS) mice had to learn to get water only during 2x3 hours per day, 11:00-14:00 and 23:00-02:00. This day pattern was maintained through the following tasks up to "Delayed Response

Learning". Outside of the drinking periods, doors remained closed and learning modules were switched to default modules ensuring that all doors remained closed and LEDs were off.

During "**place preference learning**", **PPL1c1s**, and **PPL-Reversal** mice had to learn to prefer one corner and one side of this corner, in which doors opened on a correct nosepoke on the correct side and gave access to tap water as reward. Each 4 mice each were assigned to one corner. In the reversal period (PPL-rev) the awarding corner and door were switched to the opposite corner of the cage and opposite side within the corner.

In the **Spatial Sequence Learning** protocol (SSL), mice had to learn that the next awarding corner was adjacent to the presently rewarding corner in clockwise (SSL) or anti-clockwise (SSL-rev) direction. The experiment assesses spatial learning capabilities. It is a difficult task and forces the animals to increase their visiting frequencies. The corner switch was executed only after successful drinking to ensure that the mice got the reward. If they did not drink in the correct corner, this corner remained "correct" until mice drank in this corner. The entry of a correct corner was announced by green LED, which was switched off after drinking or leaving the corner.

In the **Delayed Response Learning task**, mice had to learn to make repetitive nosepokes at the same door but at a low rate with an increasing delay between the first and second nosepoke of 4s or 6s. In the initial training (DRL4s-1neutral) one corner was defined as neutral, in which a single nosepoke opened the door but only with a probability of 50%. Subsequently, the neutral corner was closed in DRL4s and DRL6s. The DRL task is difficult and mice of both genotypes increased the visiting frequencies. Success was mostly random. During DRL6s rescue packs were provided overnight because lickings of some animals dropped below a critical amount.

After the DRL mice returned to their home cage. When they returned they were readapted with the "Free adaptation" protocol to assess unrestricted behavior and circadian rhythms.

During '**Airpuff**' (**place avoidance acquisition, PAA**) mice had to learn to avoid one corner, in which a nosepoke elicited an airpuff and doors remained closed. The acquisition was for 24 h, followed by 24 h in the home cage. On returning to the IntelliCage for evaluation of the maintenance of corner-avoidance (**Place avoidance extinction, PAEx**) mice were allowed to use all corners freely, using an NP protocol without restrictions.

Suppl. Fig 3

Actogram Free adaptation

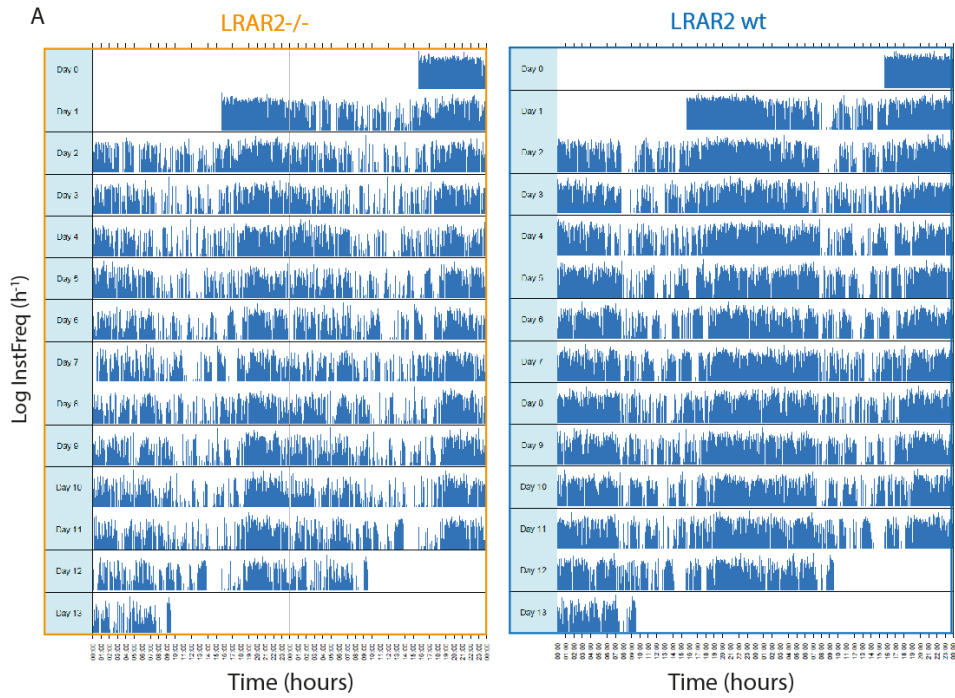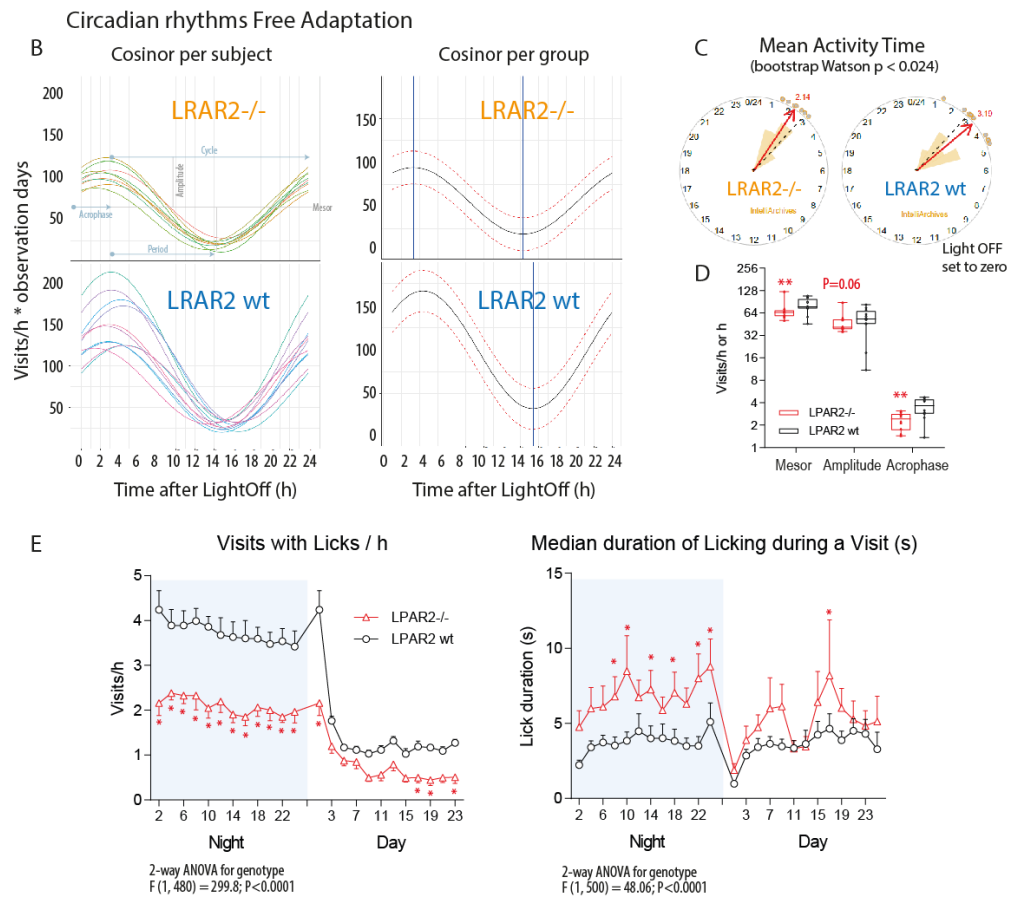

### *Supplementary Figure 3*

#### *Actograms and cosinor analysis of circadian rhythms*

Circadian analysis was done for Free Adaptation in the IntelliCage in LPAR2<sup>-/-</sup> and LPAR2 wt female mice, n = 12 per group. Mice were housed in groups of 6/6 of each genotype per IntelliCage, and were 65-85 weeks old.

**A:** Actograms reveal a higher exploratory activity in LPAR2 wt animals. Both genotypes show clear circadian rhythms.

**B-D:** Cosinor analysis for animals and groups shows the higher visiting frequency and higher fluctuations of night-to-day activity in LPAR2 wt animals resulting in higher mesor and amplitude. The acrophase of LPAR2<sup>-/-</sup> mice preceded the wt acrophase for about one hour. During experiments with restricted drinking/learning times, circadian rhythms were synchronized (acrophase 4-6 h after light off, i.e. during the night drinking period).

**E:** Circadian phased analysis of Visits/h and 'median duration of licks during a visit' during Free Adaptation in the IntelliCage. LPAR2<sup>-/-</sup> make substantially fewer visits throughout this experiment but compensate the lower visiting frequency with longer licking times during their visits. The data show the mean ± sem of 12 mice per group.

## Suppl. Fig 4

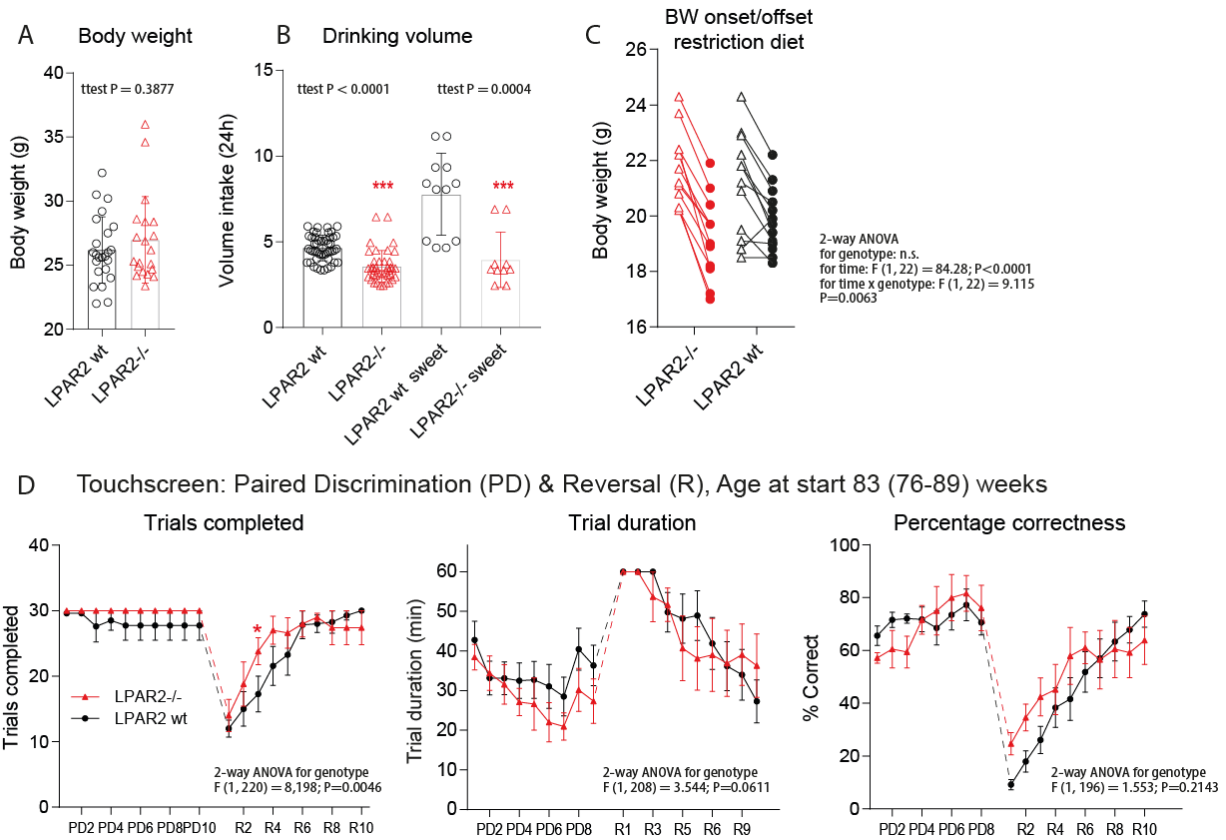

### Supplementary Figure 4

#### Body weight, sucrose preference and perseverations

**A:** Baseline bodyweights of 45-65 weeks old female LPAR2<sup>-/-</sup> and LPAR2 wt mice (n = 10, 12). Each mouse is represented twice, at onset and end of the experiment.

**B:** Drinking volume per day with free drinking and 2-choice bottles with water or sucrose-water (2%)

**C:** Body weights at onset and end of a 10% reduction diet during touchscreen experiments. LPAR2<sup>-/-</sup> lost more weight during the diet than controls (2-way ANOVA 'genotype' x 'time').

**D:** Time course of the accuracy of touchscreen touches and number of perseverations during 5CSRT task before and during CUMS. Stressors during CUMS are described in Suppl. Table 4. Data were compared with 2-way ANOVA for 'genotype' x 'trial'.

LPAR2<sup>-/-</sup> Wildtype

Upregulated in LPAR2<sup>-/-</sup>

Downregulated in LPAR2<sup>-/-</sup>

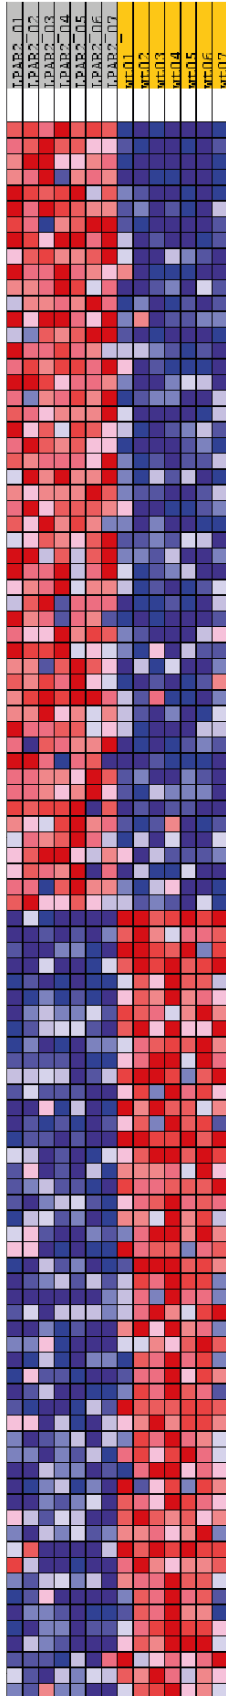

### Suppl. Fig 5

GSEA scores of leading edge 50 up and 50 down regulated

|           |                                                                                  |
|-----------|----------------------------------------------------------------------------------|
| PLVAP     | plasmalemma vesicle associated protein                                           |
| LPL       | lipoprotein lipase                                                               |
| FGF10     | fibroblast growth factor 10                                                      |
| MAMDC2    | MAM domain containing 2                                                          |
| HDHD3     | haloacid dehalogenase-like hydrolase domain containing 3                         |
| OCEL1     | occludin/ELL domain containing 1                                                 |
| TLR1      | toll-like receptor 1                                                             |
| DBP       | D site of albumin promoter (albumin D-box) binding protein                       |
| TWIST1    | twist homolog 1 (acrocephalosyndactyly 3; Saethre-Chotzen syndrome) (Drosophila) |
| CAPS2     | calcyphosine 2                                                                   |
| FMO2      | flavin containing monooxygenase 2 (non-functional)                               |
| PRR15     | proline rich 15                                                                  |
| SLAMF8    | SLAM family member 8                                                             |
| COL22A1   | collagen, type XXII, alpha 1                                                     |
| ALPK3     | alpha-kinase 3                                                                   |
| IFI30     | interferon, gamma-inducible protein 30                                           |
| NANOS3    | nanos homolog 3 (Drosophila)                                                     |
| TNFRSF13C | tumor necrosis factor receptor superfamily, member 13C                           |
| PLA2G4E   | phospholipase A2, group IVE                                                      |
| CREB3L4   | cAMP responsive element binding protein 3-like 4                                 |
| MARVELD2  | MARVEL domain containing 2                                                       |
| PBX4      | pre-B-cell leukemia transcription factor 4                                       |
| TRH       | thyrotropin-releasing hormone                                                    |
| CCDC67    | coiled-coil domain containing 67                                                 |
| CLSPN     | claspin homolog (Xenopus laevis)                                                 |
| EIF2AK2   | eukaryotic translation initiation factor 2-alpha kinase 2                        |
| UPP1      | uridine phosphorylase 1                                                          |
| PLAU      | plasminogen activator, urokinase                                                 |
| IL5       | interleukin 5 (colony-stimulating factor, eosinophil)                            |
| ACR       | acrosin                                                                          |
| DMRTB1    | DMRT-like family B with proline-rich C-terminal, 1                               |
| TDRD6     | tudor domain containing 6                                                        |
| FSTL3     | follicle-stimulating hormone-like 3 (secreted glycoprotein)                      |
| TBC1D10C  | TBC1 domain family, member 10C                                                   |
| SFRP1     | secreted frizzled-related protein 1                                              |
| ITK       | IL2-inducible T-cell kinase                                                      |
| NANOS2    | nanos homolog 2 (Drosophila)                                                     |
| IL12RB1   | interleukin 12 receptor, beta 1                                                  |
| FILP1     | filamin A interacting protein 1                                                  |
| HDDC3     | HD domain containing 3                                                           |
| DNAH8     | dynein, axonemal, heavy chain 8                                                  |
| LZTS1     | leucine zipper, putative tumor suppressor 1                                      |
| PGM5      | phosphoglucomutase 5                                                             |
| ALAD      | aminolevulinic acid, delta-, dehydratase                                         |
| SLC16A12  | solute carrier family 16, member 12 (monocarboxylic acid transporter 12)         |
| COL8A2    | collagen, type VIII, alpha 2                                                     |
| TUSC1     | tumor suppressor candidate 1                                                     |
| TEX11     | testis expressed sequence 11                                                     |
| COL8A1    | collagen, type VIII, alpha 1                                                     |
| LST1      | leukocyte specific transcript 1                                                  |
| SCOC      | short coiled-coil protein                                                        |
| FGL1      | fibrinogen-like 1                                                                |
| SLC5A5    | solute carrier family 5 (sodium iodide symporter), member 5                      |
| FUT10     | fucosyltransferase 10 (alpha (1,3) fucosyltransferase)                           |
| FOSB      | FBJ murine osteosarcoma viral oncogene homolog B                                 |
| CDKN1A    | cyclin-dependent kinase inhibitor 1A (p21, Cip1)                                 |
| HMG2      | high-mobility group box 2                                                        |
| DUSP5     | dual specificity phosphatase 5                                                   |
| CRLF1     | cytokine receptor-like factor 1                                                  |
| SERINC2   | serine incorporator 2                                                            |
| PTTG1     | pituitary tumor-transforming 1                                                   |
| NPAS4     | neuronal PAS domain protein 4                                                    |
| HPGD      | hydroxyprostaglandin dehydrogenase 15-(NAD)                                      |
| FOS       | v-fos FBJ murine osteosarcoma viral oncogene homolog                             |
| CHCHD2    | coiled-coil-helix-coiled-coil-helix domain containing 2                          |
| ABC10     | ATP-binding cassette, sub-family B (MDR/TAP), member 10                          |
| IL27RA    | interleukin 27 receptor, alpha                                                   |
| UBC       | ubiquitin C                                                                      |
| HSPB8     | heat shock 22kDa protein 8                                                       |
| ARC       | activity-regulated cytoskeleton-associated protein                               |
| PLA2G2F   | phospholipase A2, group IIF                                                      |
| NPTX2     | neuronal pentraxin II                                                            |
| GPR17     | G protein-coupled receptor 17                                                    |
| DOK3      | docking protein 3                                                                |
| EGR2      | early growth response 2 (Krox-20 homolog, Drosophila)                            |
| TDGF1     | teratocarcinoma-derived growth factor 1                                          |
| NR4A2     | nuclear receptor subfamily 4, group A, member 2                                  |
| EPS8L1    | EPS8-like 1                                                                      |
| HIST1H2BE | histone cluster 1, H2be                                                          |
| HIST1H1E  | histone cluster 1, H1e                                                           |
| HSPA5     | heat shock 70kDa protein 5 (glucose-regulated protein, 78kDa)                    |
| ACP1      | acid phosphatase 1, soluble                                                      |
| FAM89A    | family with sequence similarity 89, member A                                     |
| TMEM100   | transmembrane protein 100                                                        |
| FOSL2     | FOS-like antigen 2                                                               |
| THBS4     | thrombospondin 4                                                                 |
| B3GNT3    | UDP-GlcNAc:betaGal beta-1,3-N-acetylglucosaminyltransferase 3                    |
| ANTXR2    | anthrax toxin receptor 2                                                         |
| RAB3B     | RAB3B, member RAS oncogene family                                                |
| IRX1      | iroquois homeobox protein 1                                                      |
| ARL2BP    | ADP-ribosylation factor-like 2 binding protein                                   |
| BUB1B     | BUB1 budding uninhibited by benzimidazoles 1 homolog beta (yeast)                |
| ELOVL1    | elongation of very long chain fatty acids (FEN1/Elo2, SUR4/Elo3, yeast)-like 1   |
| PDIA6     | protein disulfide isomerase family A, member 6                                   |
| SDF2L1    | stromal cell-derived factor 2-like 1                                             |
| PHKG1     | phosphorylase kinase, gamma 1 (muscle)                                           |
| RECQL4    | RecQ protein-like 4                                                              |
| SGOL1     | shugoshin-like 1 (S. pombe)                                                      |
| TBX1      | T-box 1                                                                          |
| Bfsp2     | beaded filament structural protein 2, phakinin                                   |

### Supplementary Figure 5

#### Heat maps of GSEA ranked genes

Leading edge upregulated and downregulated 50 candidate genes in LPAR2<sup>-/-</sup> versus wildtype mice. The color scale ranges from red (upregulated) to blue (downregulated). The ranking is based on P-value, q-value and fold change.



Suppl. Figure 6

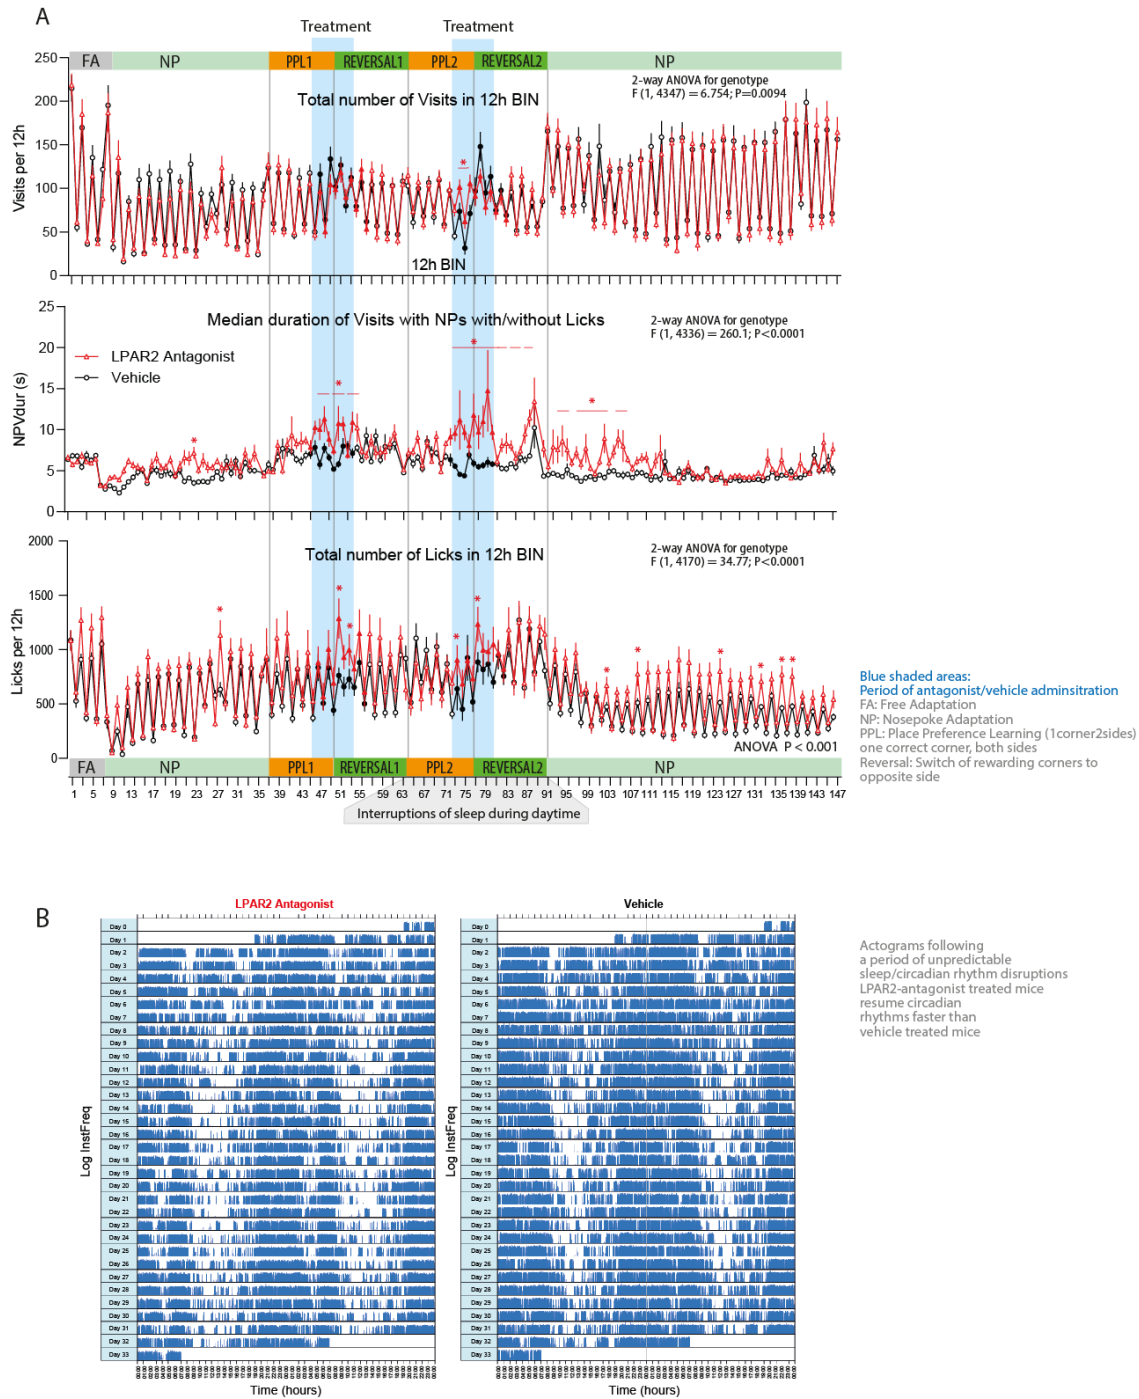

Supplementary Figure 6

*IntelliCage behavior in mice treated with LPAR2 inhibitor or vehicle*

Female mice were treated with 50 µg LPAR2-inhibitor in 2 grams cornflakes (n=13) or vehicle cornflakes (n=12) once daily in the morning. During the second Place Preference Learning period (PPL2 & REVERSAL2), mice were exposed to daytime sleep disruptions causing mild stress. Mice were 74-75 weeks old at the onset of the experiment.

**A:** Time courses of key behavioral parameters. Mice were adapted with free adaptation (FA) and nosepoke adaptation (NP) and put on a mild restriction diet (3 grams of pellets per mouse and day) to increase the appetite for the medication-cornflakes. Place preference learning (PPL1) was started and cornflakes were introduced as morning meal. The treatment period encompassed the last two days of PPL1 (or PPL2) up to the third day after Reversal of PPL1 (or Reversal PPL2) (filled symbols, blue shaded areas). Reversal refers to the switch of the rewarding corner to the opposite site. The first learning and reversal (PPL1 & Reversal) was without any disruptions, and the second PPL2 and Reversal was done with daily disruptions of daytime sleep in random order explained in Suppl. Table 5.

The data are means  $\pm$  sem. Differences between groups were assessed with 2-way ANOVA. Asterisks point to significant time points or periods for the between subject factor "group" (P not adjusted for multiple time point assessment). Dashed lines indicate that not all consecutive individual time points were significant. The tasks and daytime sleep disruptions during PPL2/REVERSAL2 are explained in Suppl. Table 2 and Suppl. Table 5, respectively.

**B:** Actograms show the activity in LPAR2-antagonist and vehicle treated mice in the post-stress/post treatment period with free access to all corners. LPAR2-antagonist treated mice regained circadian rhythms faster than vehicle treated mice, and they showed lower daytime activity suggesting fewer sleep interruptions.
